# Supplementary material for: Association Between Time to Defibrillation and Survival in Pediatric In-Hospital Cardiac Arrest With a First Documented Shockable Rhythm
Source: PubMed Central journal article supplement (PMC6324599; doi:10.1001/jamanetworkopen.2018.2643), 2018-09-21
Supplement: jamanetwopen-1-e182643-s001.pdf [file jamanetwopen-1-e182643-s001.pdf]

## Supplementary Online Content

Hunt EA, Duval-Arnould JM, Bembea MM, et al. Association Between Time to Defibrillation and Survival in Pediatric In-Hospital Cardiac Arrest With a First Documented Shockable Rhythm. *JAMA Netw Open*. 2018;1(5):e182643. doi:10.1001/jamanetworkopen.2018.2643

eAppendix. Supplementary Methods and Results

eReferences

eTable 1. Characteristics of the Study Population According to Whether or Not They Achieved Return of Circulation (ROC)

eTable 2. Characteristics of the Study Population According to 24-Hour Survival

eTable 3. Characteristics of the Study Population According to Neurological Outcome

eTable 4. Sensitivity Analyses for Various Definitions of Neurological Outcome

eTable 5. Time to Defibrillation According to Location Within Hospitals

eTable 6. Time to Defibrillation and Survival According to Quartiles of Pediatric Cardiac Arrest Cases Contributed

This supplementary material has been provided by the authors to give readers additional information about their work.

## **eAppendix – Supplementary Methods and Results**

Detailed Methods:

### *Planned sensitivity analyses for the primary outcome*

We performed preplanned sensitivity analyses for the primary outcome using multiple imputation, assuming data was “missing at random”. We imputed values for categorical variables, including survival to hospital discharge, using the fully conditional specification method.<sup>1</sup> A total of 10 data sets were created. Time to first defibrillation attempt was then imputed using a zero-inflated Poisson distribution for each of these 10 datasets.<sup>2</sup> We then performed the main analysis on these 10 data sets and combined the results using SAS “proc mianalyze”.

### *Planned secondary analysis*

As a predefined secondary analysis, we evaluated ROC in a cohort including non-index events. For this analysis, we used a similar approach as described in the main manuscript but also accounted for repeated events within the same patients using GEE.

## Results

### *Pre-specified sensitivity analysis*

In the analysis including non-index events, 564 events were included of which 477 (85%) were index events, i.e. the patient’s initial cardiac arrest. In unadjusted analysis, time to first defibrillation attempt was not associated with ROC (RR per minute increase: 0.99 [95%CI: 0.97, 1.01],  $p = 0.21$ ). In the multivariable analysis, accounting for the same variables as in the main multivariable analysis for ROC and for repeated events

within the same patient, time to first defibrillation attempt was also not associated with ROC (RR per minute increase: 0.99 [95%CI: 0.97, 1.01],  $p = 0.40$ ).

#### *Additional post-hoc sensitivity analyses*

The location of cardiac arrests within the hospital was associated time to defibrillation (Table 1) but there was notable overlap in the distributions (eTable 5). Due to concern that possible collinearity may impact the results of the model, post-hoc sensitivity analysis excluding the location variable was performed. When this variable was excluded from the model, the results were similar (RR: 1.00 [95%CI: 0.94, 1.07]). In addition, when patients on the floor (“Floor with telemetry/step-down unit” and “Floor without telemetry”) were excluded from the analysis due to very small numbers in those categories, (eTable 5) the results were also similar (RR: 0.99 [95%: 0.93, 1.05]).

Given that 113 hospitals contributed to the 477 patients, there was marked variability in the number of patients per site. When dividing the hospital into quartiles, the quartile contributing the fewest cardiac arrests ( $\leq 2$ ) had significantly lower survival to discharge (26%) than those contributing more cardiac arrests, but there was no difference in the median (IQR) time to defibrillation between the four quartiles, (eTable 6). In order to explore whether the relationship would be different when analyzing only hospitals that contributed a large volume of cardiac arrests we performed additional analysis. When we restricted the unadjusted analysis to the nine hospitals with the most cases ( $n = 252$ ), the results were similar (RR: 0.97 [95%CI: 0.91, 1.03]). Given the low sample size, we are not able to perform adjusted analyses in this subgroup.

## eReferences

1. van Buuren S. Multiple imputation of discrete and continuous data by fully conditional specification. *Stat Methods Med Res.* 2007;16(3):219-242.  
doi:10.1177/0962280206074463
2. Pahel BT, Preisser JS, Stearns SC, Rozier RG. Multiple imputation of dental caries data using a zero-inflated Poisson regression model. *J Public Health Dent.* 2011;71(1):71-78.  
doi:10.1111/j.1752-7325.2010.00197.x

**eTable 1. Characteristics of the study population according to whether or not they achieved Return of Circulation (ROC)**

| <b>Characteristics of the Study Population According to ROC</b> | <b>No ROC (n = 127)</b> | <b>ROC (n = 350)</b> | <b>p-value</b> |
|-----------------------------------------------------------------|-------------------------|----------------------|----------------|
| <b>Demographics</b>                                             |                         |                      |                |
| Gender                                                          |                         |                      | 0.67           |
| Male                                                            | 78 (61)                 | 207 (59)             |                |
| Female                                                          | 49 (39)                 | 143 (41)             |                |
| Age group                                                       |                         |                      | 0.15           |
| Neonate (< 1 month)                                             | 16 (13)                 | 73 (21)              |                |
| Infant (1 month up to 1 year)                                   | 20 (16)                 | 57 (16)              |                |
| Child (1 year to 12 years)                                      | 44 (35)                 | 117 (33)             |                |
| Adolescent (> 12 years)                                         | 47 (37)                 | 103 (29)             |                |
| <b>Illness Category</b>                                         |                         |                      |                |
| Medical cardiac                                                 | 24 (19)                 | 107 (31)             | < 0.001        |
| Medical non-cardiac                                             | 49 (39)                 | 74 (21)              |                |
| Newborn                                                         | 1 (1)                   | 6 (2)                |                |
| Surgical cardiac                                                | 18 (14)                 | 120 (34)             |                |
| Surgical non-cardiac                                            | 35 (28)                 | 43 (12)              |                |
| <b>Pre-Existing Conditions</b>                                  |                         |                      |                |
| Heart failure this admission                                    | 23 (12)                 | 67 (19)              | 0.89           |
| Heart failure prior to this admission                           | 12 (9)                  | 44 (13)              | 0.42           |
| Myocardial infarction failure this admission                    | 1 (1)                   | 12 (3)               | 0.20           |
| Myocardial infarction prior to this admission                   | 0 (0)                   | 5 (1)                | 0.33           |
| Hypotension                                                     | 45 (35)                 | 102 (29)             | 0.22           |
| Respiratory insufficiency                                       | 67 (53)                 | 169 (48)             | 0.41           |
| Renal insufficiency                                             | 19 (15)                 | 33 (9)               | 0.10           |
| Hepatic insufficiency                                           | 11 (9)                  | 10 (3)               | 0.01           |
| Metabolic/electrolyte abnormality                               | 17 (13)                 | 65 (19)              | 0.22           |
| Baseline depression in CNS function                             | 15 (12)                 | 41 (12)              | 1.00           |
| Acute stroke                                                    | 2 (2)                   | 2 (1)                | 0.29           |
| Acute non-stroke CNS event                                      | 18 (14)                 | 31 (9)               | 0.12           |
| Pneumonia                                                       | 9 (7)                   | 19 (5)               | 0.51           |
| Septicemia                                                      | 16 (13)                 | 37 (11)              | 0.51           |
| Major trauma                                                    | 33 (26)                 | 27 (8)               | < 0.001        |
| Metastatic/hematologic malignancy                               | 4 (3)                   | 7 (2)                | 0.49           |
| <b>Location and Time of the Arrest</b>                          |                         |                      |                |
| Location                                                        |                         |                      | 0.005          |
| Critical care area                                              | 98 (77)                 | 273 (78)             |                |
| Emergency department                                            | 17 (13)                 | 18 (5)               |                |
| Floor with telemetry/step-down unit                             | 0 (0)                   | 7 (2)                |                |
| Floor without telemetry                                         | 5 (4)                   | 11 (3)               |                |
| Other                                                           | 7 (6)                   | 41 (12)              |                |
| Time of week                                                    |                         |                      | 0.04           |
| Weekday                                                         | 87 (69)                 | 272 (78)             |                |
| Weekend                                                         | 40 (31)                 | 78 (22)              |                |
| Time of day                                                     |                         |                      | 0.35           |
| Daytime                                                         | 89 (70)                 | 261 (75)             |                |
| Nighttime                                                       | 38 (30)                 | 89 (25)              |                |
| <b>Characteristic of the Arrest</b>                             |                         |                      |                |

|                                                                 |                         |                      |                |
|-----------------------------------------------------------------|-------------------------|----------------------|----------------|
| Witnessed                                                       | 125 (98)                | 337 (96)             | 0.37           |
| Monitored                                                       | 121 (95)                | 337 (96)             | 0.60           |
| Mechanical ventilation in place                                 | 84 (66)                 | 246 (70)             | 0.43           |
| <b>Characteristics of the Study Population According to ROC</b> | <b>No ROC (n = 127)</b> | <b>ROC (n = 350)</b> | <b>p-value</b> |
| <b>Characteristic of the Arrest, cont.</b>                      |                         |                      |                |
| Vasopressors in place                                           | 56 (44)                 | 150 (43)             | 0.83           |
| Antiarrhythmic in place                                         | 7 (6)                   | 35 (10)              | 0.15           |
| Initial pulseless rhythm                                        |                         |                      | 0.40           |
| Pulseless ventricular tachycardia                               | 47 (37)                 | 145 (41)             |                |
| Ventricular fibrillation                                        | 80 (63)                 | 205 (59)             |                |
| Time to chest compressions (min)                                | 0 (0, 0)                | 0 (0, 0)             | 0.60           |
| <b>Hospital Characteristics</b>                                 |                         |                      |                |
| Type of hospital                                                |                         |                      | 0.002          |
| Primarily adult                                                 | 82 (65)                 | 169 (48)             |                |
| Primarily children                                              | 45 (35)                 | 181 (52)             |                |
| Teaching status                                                 |                         |                      | 0.12           |
| Major                                                           | 85 (67)                 | 267 (76)             |                |
| Minor                                                           | 34 (27)                 | 68 (19)              |                |
| Non-teaching                                                    | 8 (6)                   | 15 (4)               |                |
| <b>Year of the Arrest</b>                                       |                         |                      | 0.07           |
| 2000 - 2005                                                     | 53 (42)                 | 107 (31)             |                |
| 2006 - 2010                                                     | 37 (29)                 | 132 (38)             |                |
| 2011 - 2016                                                     | 37 (29)                 | 111 (32)             |                |

<sup>a</sup> ROC: return of circulation, CNS: central nervous system

**eTable 2. Characteristics of the study population according to 24-hour survival<sup>a</sup>**

| Characteristics of the Study Population       | No 24-hour Survival (n = 193) | 24-hour Survival (n = 284) | p-value |
|-----------------------------------------------|-------------------------------|----------------------------|---------|
| <b>Demographics</b>                           |                               |                            |         |
| Gender                                        |                               |                            | 0.22    |
| Male                                          | 122 (63)                      | 163 (57)                   |         |
| Female                                        | 71 (37)                       | 121 (43)                   |         |
| Age group                                     |                               |                            | 0.01    |
| Neonate (< 1 month)                           | 24 (12)                       | 65 (23)                    |         |
| Infant (1 month up to 1 year)                 | 30 (16)                       | 47 (17)                    |         |
| Child (1 year to 12 years)                    | 66 (34)                       | 95 (33)                    |         |
| Adolescent (> 12 years)                       | 73 (38)                       | 77 (27)                    |         |
| <b>Illness Category</b>                       |                               |                            |         |
|                                               |                               |                            | < 0.001 |
| Medical cardiac                               | 37 (19)                       | 94 (33)                    |         |
| Medical non-cardiac                           | 78 (40)                       | 45 (16)                    |         |
| Newborn                                       | 1 (1)                         | 6 (2)                      |         |
| Surgical cardiac                              | 21 (11)                       | 117 (41)                   |         |
| Surgical non-cardiac                          | 56 (29)                       | 22 (8)                     |         |
| <b>Pre-Existing Conditions</b>                |                               |                            |         |
| Heart failure this admission                  | 30 (16)                       | 60 (21)                    | 0.15    |
| Heart failure prior to this admission         | 15 (8)                        | 41 (14)                    | 0.03    |
| Myocardial infarction failure this admission  | 3 (2)                         | 10 (4)                     | 0.26    |
| Myocardial infarction prior to this admission | 2 (1)                         | 3 (1)                      | 1.00    |
| Hypotension                                   | 74 (38)                       | 73 (26)                    | 0.005   |
| Respiratory insufficiency                     | 108 (56)                      | 128 (45)                   | 0.02    |
| Renal insufficiency                           | 29 (15)                       | 23 (8)                     | 0.02    |
| Hepatic insufficiency                         | 12 (6)                        | 9 (3)                      | 0.12    |
| Metabolic/electrolyte abnormality             | 36 (19)                       | 46 (16)                    | 0.54    |
| Baseline depression in CNS function           | 34 (18)                       | 22 (8)                     | 0.001   |
| Acute stroke                                  | 3 (2)                         | 1 (0)                      | 0.31    |
| Acute non-stroke CNS event                    | 40 (21)                       | 9 (3)                      | < 0.001 |
| Pneumonia                                     | 15 (8)                        | 13 (5)                     | 0.17    |
| Septicemia                                    | 25 (13)                       | 28 (10)                    | 0.30    |
| Major trauma                                  | 48 (25)                       | 12 (4)                     | < 0.001 |
| Metastatic/hematologic malignancy             | 5 (3)                         | 6 (2)                      | 0.76    |
| <b>Location and Time of the Arrest</b>        |                               |                            |         |
| Location                                      |                               |                            | < 0.001 |
| Critical care area                            | 151 (78)                      | 220 (77)                   |         |
| Emergency department                          | 26 (13)                       | 9 (3)                      |         |
| Floor with telemetry/step-down unit           | 1 (1)                         | 6 (2)                      |         |
| Floor without telemetry                       | 7 (4)                         | 9 (3)                      |         |
| Other                                         | 8 (4)                         | 40 (14)                    |         |
| Time of week                                  |                               |                            | 0.19    |
| Weekday                                       | 139 (72)                      | 220 (77)                   |         |
| Weekend                                       | 54 (28)                       | 64 (23)                    |         |
| Time of day                                   |                               |                            | 0.07    |
| Daytime                                       | 133 (69)                      | 217 (76)                   |         |
| Nighttime                                     | 60 (31)                       | 67 (24)                    |         |
| Witnessed                                     | 186 (96)                      | 276 (97)                   | 0.61    |
| Monitored                                     | 185 (96)                      | 273 (96)                   | 1.00    |

|                                                |                                      |                                   |                |
|------------------------------------------------|--------------------------------------|-----------------------------------|----------------|
| Mechanical ventilation in place                | 140 (73)                             | 190 (67)                          | 0.23           |
| Vasopressors in place                          | 90 (47)                              | 116 (41)                          | 0.22           |
| Antiarrhythmic in place                        | 14 (7)                               | 28 (10)                           | 0.41           |
| <b>Characteristics of the Study Population</b> | <b>No 24-hour Survival (n = 193)</b> | <b>24-hour Survival (n = 284)</b> | <b>p-value</b> |
| Initial pulseless rhythm                       |                                      |                                   | 0.25           |
| Pulseless ventricular tachycardia              | 84 (44)                              | 108 (38)                          |                |
| Ventricular fibrillation                       | 109 (56)                             | 176 (62)                          |                |
| Time to chest compressions (min)               | 0 (0, 0)                             | 0 (0, 0)                          | 0.61           |
| <b>Hospital Characteristics</b>                |                                      |                                   |                |
| Type of hospital                               |                                      |                                   | < 0.001        |
| Primarily adult                                | 126 (65)                             | 125 (44)                          |                |
| Primarily children                             | 67 (35)                              | 159 (56)                          |                |
| Teaching status                                |                                      |                                   | 0.01           |
| Major                                          | 129 (67)                             | 223 (79)                          |                |
| Minor                                          | 50 (26)                              | 52 (18)                           |                |
| Non-teaching                                   | 14 (7)                               | 9 (3)                             |                |
| <b>Year of the Arrest</b>                      |                                      |                                   | 0.002          |
| 2000 - 2005                                    | 83 (43)                              | 77 (27)                           |                |
| 2006 - 2010                                    | 57 (30)                              | 112 (39)                          |                |
| 2011 - 2016                                    | 53 (27)                              | 95 (33)                           |                |

<sup>a</sup> CNS: central nervous system



**eTable 3. Characteristics of the study population according to neurological outcome<sup>a</sup>**

| Characteristics of the Study Population       | Poor Neurological Outcome (n = 314) | Good Neurological Outcome (n = 98) | p-value |
|-----------------------------------------------|-------------------------------------|------------------------------------|---------|
| <b>Demographics</b>                           |                                     |                                    |         |
| Gender                                        |                                     |                                    | 0.56    |
| Male                                          | 191 (61)                            | 56 (57)                            |         |
| Female                                        | 123 (39)                            | 42 (43)                            |         |
| Age group                                     |                                     |                                    | 0.92    |
| Neonate (< 1 month)                           | 55 (18)                             | 20 (20)                            |         |
| Infant (1 month up to 1 year)                 | 47 (15)                             | 14 (14)                            |         |
| Child (1 year to 12 years)                    | 109 (35)                            | 32 (33)                            |         |
| Adolescent (> 12 years)                       | 103 (33)                            | 32 (33)                            |         |
| <b>Illness Category</b>                       |                                     |                                    | < 0.001 |
| Medical cardiac                               | 70 (22)                             | 34 (35)                            |         |
| Medical non-cardiac                           | 104 (33)                            | 10 (10)                            |         |
| Newborn                                       | 3 (1)                               | 3 (3)                              |         |
| Surgical cardiac                              | 66 (21)                             | 46 (47)                            |         |
| Surgical non-cardiac                          | 71 (23)                             | 5 (5)                              |         |
| <b>Pre-Existing Conditions</b>                |                                     |                                    |         |
| Heart failure this admission                  | 53 (17)                             | 26 (27)                            | 0.04    |
| Heart failure prior to this admission         | 34 (11)                             | 17 (17)                            | 0.11    |
| Myocardial infarction failure this admission  | 7 (2)                               | 5 (5)                              | 0.17    |
| Myocardial infarction prior to this admission | 2 (1)                               | 3 (3)                              | 0.09    |
| Hypotension                                   | 110 (35)                            | 28 (29)                            | 0.27    |
| Respiratory insufficiency                     | 183 (58)                            | 37 (38)                            | < 0.001 |
| Renal insufficiency                           | 47 (15)                             | 4 (4)                              | 0.003   |
| Hepatic insufficiency                         | 20 (6)                              | 1 (1)                              | 0.04    |
| Metabolic/electrolyte abnormality             | 61 (19)                             | 13 (13)                            | 0.18    |
| Baseline depression in CNS function           | 49 (16)                             | 3 (3)                              | < 0.001 |
| Acute stroke                                  | 4 (1)                               | 0 (0)                              | 0.58    |
| Acute non-stroke CNS event                    | 46 (15)                             | 2 (2)                              | < 0.001 |
| Pneumonia                                     | 25 (8)                              | 1 (1)                              | 0.009   |
| Septicemia                                    | 44 (14)                             | 5 (5)                              | 0.02    |
| Major trauma                                  | 56 (18)                             | 3 (3)                              | < 0.001 |
| Metastatic/hematologic malignancy             | 9 (3)                               | 2 (2)                              | 1.00    |
| <b>Location and Time of the Arrest</b>        |                                     |                                    |         |
| Location                                      |                                     |                                    | 0.02    |
| Critical care area                            | 252 (80)                            | 73 (74)                            |         |
| Emergency department                          | 30 (10)                             | 4 (4)                              |         |
| Floor with telemetry/step-down unit           | 3 (1)                               | 3 (3)                              |         |
| Floor without telemetry                       | 10 (3)                              | 4 (4)                              |         |
| Other                                         | 19 (6)                              | 14 (14)                            |         |
| Time of week                                  |                                     |                                    | 0.60    |
| Weekday                                       | 230 (73)                            | 75 (77)                            |         |
| Weekend                                       | 84 (27)                             | 23 (23)                            |         |
| Time of day                                   |                                     |                                    | 0.12    |
| Daytime                                       | 22 (70)                             | 77 (79)                            |         |
| Nighttime                                     | 93 (30)                             | 21 (21)                            |         |

| <b>Characteristic of the Arrest</b>            |                                                        |                                                       |                |
|------------------------------------------------|--------------------------------------------------------|-------------------------------------------------------|----------------|
| Witnessed                                      | 304 (97)                                               | 94 (96)                                               | 0.75           |
| Monitored                                      | 304 (97)                                               | 92 (94)                                               | 0.23           |
| Mechanical ventilation in place                | 228 (73)                                               | 60 (61)                                               | 0.04           |
| <b>Characteristics of the Study Population</b> | <b>Poor<br/>Neurological<br/>Outcome<br/>(n = 314)</b> | <b>Good<br/>Neurological<br/>Outcome<br/>(n = 98)</b> | <b>p-value</b> |
| <b>Characteristic of the Arrest, cont.</b>     |                                                        |                                                       |                |
| Vasopressors in place                          | 146 (47)                                               | 38 (39)                                               | 0.20           |
| Antiarrhythmic in place                        | 25 (8)                                                 | 14 (14)                                               | 0.07           |
| Initial pulseless rhythm                       |                                                        |                                                       | 0.48           |
| Pulseless ventricular tachycardia              | 128 (41)                                               | 44 (45)                                               |                |
| Ventricular fibrillation                       | 186 (59)                                               | 54 (55)                                               |                |
| Time to chest compressions (min)               |                                                        |                                                       |                |
| <b>Hospital Characteristics</b>                |                                                        |                                                       |                |
| Type of hospital                               |                                                        |                                                       | 0.82           |
| Primarily adult                                | 178 (57)                                               | 57 (58)                                               |                |
| Primarily children                             | 136 (43)                                               | 41 (42)                                               |                |
| Teaching status                                |                                                        |                                                       | 0.74           |
| Major                                          | 220 (70)                                               | 73 (74)                                               |                |
| Minor                                          | 77 (25)                                                | 21 (21)                                               |                |
| Non-teaching                                   | 17 (5)                                                 | 4 (4)                                                 |                |
| <b>Year of the Arrest</b>                      |                                                        |                                                       | 0.24           |
| 2000 - 2005                                    | 122 (39)                                               | 29 (30)                                               |                |
| 2006 - 2010                                    | 108 (34)                                               | 40 (41)                                               |                |
| 2011 - 2016                                    | 84 (27)                                                | 29 (30)                                               |                |

<sup>a</sup> CNS: central nervous system

**eTable 4. Sensitivity analyses for various definitions of neurological outcome<sup>a</sup>**

| <b>Sensitivity Analyses for Various Definitions of Neurological Outcome<sup>a</sup></b> |                |                               |                |                               |                |
|-----------------------------------------------------------------------------------------|----------------|-------------------------------|----------------|-------------------------------|----------------|
| <b>Good Neurological Outcome</b>                                                        | <b>Overall</b> | <b>Unadjusted</b>             |                | <b>Multivariable</b>          |                |
|                                                                                         |                | <b>RR (95%CI)<sup>b</sup></b> | <b>p-value</b> | <b>RR (95%CI)<sup>b</sup></b> | <b>p-value</b> |
| PCPC of 1 or 2, or no increase in PCPC from baseline                                    | 105/401 (26%)  | 0.97 (0.90, 1.04)             | 0.35           | 0.98 (0.92, 1.05)             | 0.62           |
| PCPC of 1, 2, or 3                                                                      | 103/412 (25%)  | 0.98 (0.92, 1.05)             | 0.54           | 0.99 (0.92, 1.07)             | 0.77           |
| PCPC of 1, 2, or 3, or no increase in PCPC from baseline                                | 108/411 (26%)  | 0.97 (0.91, 1.04)             | 0.40           | 0.98 (0.91, 1.05)             | 0.58           |

<sup>a</sup> PCPC = pediatric cerebral performance category

<sup>b</sup> Per minute delay in time to defibrillation

**eTable 5. Time to defibrillation according to location within hospitals**

| Location within Hospital            | N   | Mean | SD | Median | First quartile | Third quartile | Min. | Max. |
|-------------------------------------|-----|------|----|--------|----------------|----------------|------|------|
| Critical care area                  | 371 | 2    | 3  | 1      | 0              | 3              | 0    | 10   |
| Emergency department                | 35  | 2    | 2  | 1      | 0              | 4              | 0    | 8    |
| Floor with telemetry/step-down unit | 7   | 2    | 2  | 1      | 0              | 3              | 0    | 7    |
| Floor without telemetry             | 16  | 4    | 3  | 4      | 1              | 7              | 0    | 9    |
| Other                               | 48  | 2    | 2  | 1      | 0              | 2              | 0    | 10   |

**eTable 6. Time to defibrillation and survival according to quartiles of pediatric cardiac arrest cases contributed**

| Hospital Quartile | N   | Time to Defibrillation<br>Median (Q1, Q3) | P<br>value | Survival (%) | P<br>value |
|-------------------|-----|-------------------------------------------|------------|--------------|------------|
| 1: ≤ 2 cases      | 100 | 1 (0, 3)                                  | 0.94       | 26/100 (26)  | 0.01       |
| 2: 3 – 16 cases   | 125 | 1 (0, 3)                                  |            | 46/125 (37)  |            |
| 3: 17 – 37 cases  | 128 | 1 (0, 3)                                  |            | 60/128 (47)  |            |
| 4: ≥ 38 cases     | 124 | 1 (0, 3)                                  |            | 47/124 (38)  |            |
